# Supplementary material
Source: PubMed Central journal article supplement (PMC3791145)
Supplement: NIHMS473839-supplement-01.pdf [file NIHMS473839-supplement-01.pdf]

Supplemental Table S1: Confirmed nonsynonymous SNV coverage metrics and minor allele frequencies

| Fam ID | Sub ID | Gene Symbol and Name                                                | Chr | Pos       | Ref | Alt | Region of Homozygosity Size | Comb Score | AA Change | Quality Score | Allele Depth (Ref,Alt) | Phred Likelihood (0/0,0/1,1/1) | rs#         | 1000G Freq (%) | EVS Eur Freq (%) | EVS Afr Freq (%) | EVS Freq (%) |
|--------|--------|---------------------------------------------------------------------|-----|-----------|-----|-----|-----------------------------|------------|-----------|---------------|------------------------|--------------------------------|-------------|----------------|------------------|------------------|--------------|
| 283    | 1511   | <b>DAK</b><br>Dihydroxyacetone Kinase 2 Homolog                     | 11  | 61113007  | C   | T   | 808kb                       | 9.5        | A474V     | 1892.32       | 3,62                   | 1950,95,0                      | rs34152582  | 0.05           | 0                | 0.41             | 0.14         |
| 283    | 1511   | <b>CD248</b><br>CD248 Molecule, Endosialin                          | 11  | 66084374  | C   | T   | 51kb                        | 7.3        | R42H      | 278.18        | 0,10                   | 332,27,0                       | rs199630152 | 0.03           | 0.95             | 0.33             |              |
| 283    | 1511   | <b>IFI44L</b><br>Interferon-induced Protein 44-like                 | 1   | 79095572  | G   | A   | 2876kb                      | 6.0        | G232E     | 5925.08       | 2,154                  | 5892,457,0                     | rs75931592  | 0.27           | 0                | 0.61             | 0.21         |
| 283    | 1511   | <b>MKGPRD</b><br>MAS-related GPR, Member D                          | 11  | 68747840  | G   | A   | -                           | 4.8        | R206W     | 1127.91       | 0,36                   | 1185,96,0                      | rs146025023 | 0.14           | 0                | 1.05             | 0.35         |
| 466    | 2150   | <b>DLG1</b><br>Discs, Large Homolog 1                               | 3   | 196792663 | C   | A   | 557kb                       | 7.3        | V717L     | 8023.66       | 0,119                  | 4623,355,0                     | rs148283553 | 0.05           | 0.14             | 0.25             | 0.18         |
| 466    | 2239   | <b>DLG1</b><br>Discs, Large Homolog 1                               | 3   | 196792663 | C   | A   | 557kb                       | 7.3        | V717L     | 8023.66       | 2,80                   | 2989,165,0                     | rs148283553 | 0.05           | 0.14             | 0.25             | 0.18         |
| 466    | 2150   | <b>ZNF77</b><br>Zinc Finger Protein 77                              | 19  | 2934694   | C   | A   | 58kb                        | 6.6        | C144F     | 20002.73      | 0,282                  | 10556,831,0                    | rs76396690  | 1              | 0.03             | 1.91             | 0.67         |
| 466    | 2239   | <b>ZNF77</b><br>Zinc Finger Protein 77                              | 19  | 2934694   | C   | A   | 58kb                        | 6.6        | C144F     | 20002.73      | 4,155                  | 5679,324,0                     | rs76396690  | 1              | 0.03             | 1.91             | 0.67         |
| 466    | 2150   | <b>GBP7</b><br>Guanylate Binding Protein 7                          | 1   | 89615023  | C   | G   | 3067kb                      | 5.9        | M368I     | 14158.08      | 1,215                  | 7575,617,0                     | rs74098339  | 1              | 0                | 3.25             | 1.1          |
| 466    | 2239   | <b>GBP7</b><br>Guanylate Binding Protein 7                          | 1   | 89615023  | C   | G   | 3067kb                      | 5.9        | M368I     | 14158.08      | 0,180                  | 6245,515,0                     | rs74098339  | 1              | 0                | 3.25             | 1.1          |
| 475    | 2173   | <b>TMEM63A</b><br>Transmembrane Protein 63A                         | 1   | 226054381 | T   | G   | 81kb                        | 7.0        | N190H     | 5131.37       | 1,69                   | 2680,202,0                     | rs115347439 | 1              | 0.02             | 3.79             | 1.3          |
| 475    | 2173   | <b>MTMR11</b><br>Myotubularin Related Protein 11                    | 1   | 149902426 | G   | A   | 3613kb                      | 6.3        | T421I     | 18440.51      | 3,249                  | 9132,619,0                     | rs114842926 | 0.18           | 0.22             | 0.02             | 0.15         |
| 489    | 2206   | <b>MMP2</b><br>Matrix Metalloproteinase 2                           | 16  | 55525819  | G   | T   | 246kb                       | 9.1        | K429N     | 4043.24       | 4,115                  | 3938,244,0                     | rs201083413 | 0.05           |                  |                  |              |
| 489    | 2206   | <b>XKR9</b><br>XK, Kell Blood Group Complex Subunit-related Family, | 8   | 71646361  | T   | A   | 11277kb                     | 8.0        | F275Y     | 5124.18       | 1,137                  | 5079,367,0                     | rs74941166  | 0.41           | 0.48             | 0.09             | 0.35         |

| Member 9 |      |                                             |   |           |   |   |   |     |      |        |      |          |             |      |      |      |      |
|----------|------|---------------------------------------------|---|-----------|---|---|---|-----|------|--------|------|----------|-------------|------|------|------|------|
| 489      | 2206 | <b>ZNF696</b><br>Zinc Finger<br>Protein 696 | 8 | 144377951 | C | T | - | 2.3 | R36W | 361.74 | 0,12 | 419,33,0 | rs140398403 | 0.37 | 0.69 | 0.18 | 0.52 |

Chr: Chromosome; Pos: Position; Ref: Reference Allele; Alt: Alternate Allele;; CombScore: Combined Weighted Pathogenicity Score; AA Change: Amino Acid Change; rs#: Reference SNP #; 1000G Freq: 1000 Genomes Database Allele Frequency; EVS: Exome Variant Server; Eur: European; Afr: African; Freq: Allele Frequency

Supplemental Table S2: Confirmed nonsynonymous SNV pathogenicity scores

| Fam ID | Gene Symbol and Name                                                         | Chr | Pos       | Ref | Alt | Region of Homozygosity Size | Comb Score | PhastCons | GERP | Sift Prediction | Sift Score | PP2 Predict       | PP2 Prob | PhyloP   | LRT      | MT       |
|--------|------------------------------------------------------------------------------|-----|-----------|-----|-----|-----------------------------|------------|-----------|------|-----------------|------------|-------------------|----------|----------|----------|----------|
| 283    | <b>DAK</b><br>Dihydroxyacetone Kinase 2 Homolog                              | 11  | 61113007  | C   | T   | 808kb                       | 9.5        | 1         | 5.71 | TOLERATED       | 0.09       | probably damaging | 0.99     | 0.999311 | 1        | 0.999977 |
| 283    | <b>CD248</b><br>CD248 Molecule, Endosialin                                   | 11  | 66084374  | C   | T   | 51kb                        | 7.3        | 1         | 2.06 | TOLERATED       | 0.08       | probably damaging | 0.953    | 0.945553 | 0.994846 | 0.260201 |
| 283    | <b>IFI44L</b><br>Interferon-induced Protein 44-like                          | 1   | 79095572  | G   | A   | 2876kb                      | 6.0        | 0.035     | 2.83 | DAMAGING        | 0.01       | probably damaging | 0.988    | 0.997777 | 0.999999 | 0.171589 |
| 283    | <b>MRGPRD</b><br>MAS-related GPR, Member D                                   | 11  | 68747840  | G   | A   | -                           | 4.8        | 0         | 2.24 | DAMAGING        | 0.05       | probably damaging | 0.979    | 0.929859 | 0.765883 | 0.095107 |
| 466    | <b>DLG1</b><br>Discs, Large Homolog 1                                        | 3   | 196792663 | C   | A   | 557kb                       | 7.3        | 1         | 5.08 | TOLERATED       | 0.26       | possibly damaging | 0.809    | 0.998657 | 0.99972  | 0.867802 |
| 466    | <b>ZNF77</b><br>Zinc Finger Protein 77                                       | 19  | 2934694   | C   | A   | 58kb                        | 6.6        | 0.003     | 2.31 | DAMAGING        | 0.01       | possibly damaging | 0.83     | 0.991509 | 1        | 1        |
| 466    | <b>GBP7</b><br>Guanylate Binding Protein 7                                   | 1   | 89615023  | C   | G   | 3067kb                      | 5.9        | 1         | 2.97 | TOLERATED       | 0.12       | possibly damaging | 0.621    | 0.992397 | 0.999988 | 0.445681 |
| 475    | <b>TMEM63A</b><br>Transmembrane Protein 63A                                  | 1   | 226054381 | T   | G   | 81kb                        | 7.0        | 0.924     | 5.04 | DAMAGING        | 0.01       | possibly damaging | 0.733    | 0.997424 | 0.999996 | 0.355015 |
| 475    | <b>MTMR11</b><br>Myotubularin Related Protein 11                             | 1   | 149902426 | G   | A   | 3613kb                      | 6.3        | 0.761     | 4.84 | DAMAGING        | 0.05       | benign            | 0.467    | 0.999681 | 0.988959 | 0.925617 |
| 489    | <b>MMP2</b><br>Matrix Metalloproteinase 2                                    | 16  | 55525819  | G   | T   | 246kb                       | 9.1        | 1         | 4.88 | TOLERATED       | 0.08       | probably damaging | 0.916    | 0.999399 | 1        | 0.99996  |
| 489    | <b>XKR9</b><br>XK, Kell Blood Group Complex Subunit-related Family, Member 9 | 8   | 71646361  | T   | A   | 11277kb                     | 8.0        | 1         | 3.06 | TOLERATED       | 0.33       | probably damaging | 0.998    | 0.964684 | 0.999981 | 0.999476 |
| 489    | <b>ZNF696</b><br>Zinc Finger Protein 696                                     | 8   | 144377951 | C   | T   | -                           | 2.3        | 0.002     | 0.61 | DAMAGING        | 0.01       | Nonsynonymous     | unknown  | NaN      | 0.892855 | 0.828047 |

Chr: Chromosome; Pos: Position; Ref: Reference Allele; Alt: Alternate Allele; CombScore: Combined Weighted Pathogenicity Score

Supplemental Table S3: Confirmed frameshift insertion and deletion (indel) coverage metrics, minor allele frequencies, and pathogenicity scores

| Family ID | Subject ID | Gene Symbol and Name                        | Chr | Pos      | Ref   | Alt   | Region of Homozygosity Size | Quality Score | Allele Depth (Ref,Alt) | Phred Likelihood (0/0,0/1,1/1) | PhastCons | Type       | NMD |
|-----------|------------|---------------------------------------------|-----|----------|-------|-------|-----------------------------|---------------|------------------------|--------------------------------|-----------|------------|-----|
| 283       | 1511       | <b>LEPR</b><br>Leptin Receptor Precursor    | 1   | 66058400 | CT    | C     | 1297kb                      | 4413.7        | 2,110                  | 4414,241,0                     | 0.95      | FRAMESHIFT | 1   |
| 466       | 2150       | <b>LEPR</b><br>Leptin Receptor Precursor    | 1   | 66038116 | CA    | C     | 1703kb                      | 6685.95       | 4,103                  | 4132,130,0                     | 0.929     | FRAMESHIFT | 1   |
| 466       | 2239       | <b>LEPR</b><br>Leptin Receptor Precursor    | 1   | 66038116 | CA    | C     | 1703kb                      | 6685.95       | 0,61                   | 2554,184,0                     | 0.929     | FRAMESHIFT | 1   |
| 475       | 2173       | <b>ACOT4</b> Acyl-coenzyme A Thioesterase 4 | 14  | 74060511 | T     | TTCAA | 94kb                        | 28352.32      | 6,135                  | 11810,299,0                    | 0.975     | FRAMESHIFT | 1   |
| 475       | 2173       | <b>ACOT4</b> Acyl-coenzyme A Thioesterase 4 | 14  | 74060513 | GCTTA | G     | 94kb                        | 19886.95      | 9,137                  | 8553,239,0                     | 1         | FRAMESHIFT | 0   |

Chr: Chromosome; Pos: Position; Ref: Reference Allele; Alt: Alternate Allele; NMD: Nonsense Mediated Decay
